# Supplementary material for: Genome-wide association study identifies candidate genes for salt tolerance in traditional rice landraces
Source: Research Square preprint supplement (doi:10.21203/rs.3.rs-7832023/v1), 2025-11-03
Supplement: Supplementary file 1 [file 4816965c1d5f86e76a5465f0.xlsx]

## Sheet: Table S1
Table S1 Basic information of 372 rice accessions
ID	Name	Group	Province	Location	Ind/Jap
S4	Xuxuwangu	GZ	Guizhou	Kaiyang,Guizhou	japonica
S5	Ainuo	GZ	Guizhou	Xiuwen,Guizhou	japonica
S6	Lengshuiqinggan	GZ	Guizhou	Zhijin,Guizhou	japonica
S7	Lengshuihong	GZ	Guizhou	Duyun,Guizhou	indica
S8	Lengshuihongnuo	GZ	Guizhou	Longli,Guizhou	indica
S9	Baiyangnuo	GZ	Guizhou	Wengan,Guizhou	japonica
S10	Aigannuo	GZ	Guizhou	Wengan,Guizhou	japonica
S11	Jixuenuo	GZ	Guizhou	Liuzhi,Guizhou	japonica
S12	Dongbannuo	GZ	Guizhou	Qianxi,Guizhou	japonica
S13	Hanfangu	GZ	Guizhou	Pingtang,Guizhou	japonica
S14	Maoyaonuo	GZ	Guizhou	Pingtang,Guizhou	japonica
S16	Yindongnuo	GZ	Guizhou	Zunyi,Guizhou	indica
S17	Wushaozhan	GZ	Guizhou	Xishui,Guizhou	indica
S18	Huangsinuo	GZ	Guizhou	Xishui,Guizhou	indica
S19	Gaishuibai	GZ	Guizhou	Fenggang,Guizhou	indica
S20	Huangkenuo	GZ	Guizhou	Paba,Guizhou	japonica
S21	Baiyangnuodao	GZ	Guizhou	Xifeng,Guizhou	japonica
S22	Huangkenuodao	GZ	Guizhou	Ziyun,Guizhou	japonica
S23	Maweizhan	GZ	Guizhou	Huishui,Guizhou	indica
S24	Xiaobeinuo	GZ	Guizhou	Changshun,Guizhou	japonica
S25	Jikanuo	GZ	Guizhou	Guiding,Guizhou	indica
S26	Wanminuo	GZ	Guizhou	Guiding,Guizhou	indica
S27	Banbiannuo	GZ	Guizhou	Huangping,Guizhou	indica
S28	Mengguandamagu	GZ	Guizhou	Guiyang,Guizhou	indica
S29	Maomaogu	GZ	Guizhou	Renhuai,Guizhou	indica
S30	Ditounuo	GZ	Guizhou	Puding,Guizhou	indica
S31	Nuoganzi	GZ	Guizhou	Jinsha,Guizhou	indica
S32	Yexiacang	GZ	Guizhou	Dejiang,Guizhou	indica
S33	Maonuo	GZ	Guizhou	Fuquan,Guizhou	indica
S34	Yezhunuo	GZ	Guizhou	Leishan,Guizhou	japonica
S35	Baijiaozhan	GZ	Guizhou	Guiyang,Guizhou	indica
S36	Banbiannuodao	GZ	Guizhou	Songtao,Guizhou	indica
S37	Maquegu	GZ	Guizhou	Sansui,Guizhou	indica
S38	Baikedanuo	GZ	Guizhou	Cengong,Guizhou	japonica
S39	Hangu	GZ	Guizhou	Cengong,Guizhou	japonica
S40	Zhangunuo	GZ	Guizhou	Shibing,Guizhou	japonica
S41	Dabaigu	GZ	Guizhou	Wanshan,Guizhou	indica
S42	Tuangu	GZ	Guizhou	Jiangkou,Guizhou	indica
S43	Liushizao	GZ	Guizhou	Tongren,Guizhou	indica
S44	Yangyanzhan	GZ	Guizhou	Tongren,Guizhou	indica
S45	Tuangu	GZ	Guizhou	Shiqian,Guizhou	indica
S46	Xiaonuogu	GZ	Guizhou	Shiqian,Guizhou	indica
S47	Miantiaozhan	GZ	Guizhou	Sinan,Guizhou	indica
S48	Yangbainuo	GZ	Guizhou	Sinan,Guizhou	indica
S49	Yinnongnuo	GZ	Guizhou	Yinjiang,Guizhou	indica
S50	Hanmaodao	GZ	Guizhou	Anlong,Guizhou	japonica
S51	Hongkewangu	GZ	Guizhou	Anlong,Guizhou	japonica
S53	Huangkexianzhan	GZ	Guizhou	Anlong,Guizhou	japonica
S54	Changlijingzhan	GZ	Guizhou	Anlong,Guizhou	japonica
S55	Feidongnuo	GZ	Guizhou	Anlong,Guizhou	japonica
S56	Hongkenuo	GZ	Guizhou	Guanling,Guizhou	japonica
S57	Wumaohandao	GZ	Guizhou	Panxian,Guizhou	indica
S58	Maohanwangu	GZ	Guizhou	Xingren,Guizhou	indica
S59	Xingrendahongwangu	GZ	Guizhou	Xingren,Guizhou	japonica
S60	Huanghanwangu	GZ	Guizhou	Xingren,Guizhou	indica
S61	Xiaohangu	GZ	Guizhou	Zhenfeng,Guizhou	indica
S63	Baiguonuo	GZ	Guizhou	Pu'an,Guizhou	japonica
S64	Zaohuangnuo	GZ	Guizhou	Pu'an,Guizhou	japonica
S65	Panggu	GZ	Guizhou	Pu'an,Guizhou	indica
S66	Xiangkegu	GZ	Guizhou	Xingyi,Guizhou	indica
S67	Damagu	GZ	Guizhou	Qinglong,Guizhou	indica
S71	Hongkenuodao	GZ	Guizhou	Qinglong,Guizhou	japonica
S72	Guangtounuo	GZ	Guizhou	Wangmo,Guizhou	japonica
S74	Huangkexiannuo	GZ	Guizhou	Wangmo,Guizhou	japonica
S75	Haocunuo	GZ	Guizhou	Wangmo,Guizhou	japonica
S76	Suomicao	GZ	Guizhou	Wangmo,Guizhou	indica
S77	Jingdao	GZ	Guizhou	Wangmo,Guizhou	japonica
S78	Hongwanjing	GZ	Guizhou	Wangmo,Guizhou	japonica
S79	Dabaigu	GZ	Guizhou	Sandu,Guizhou	indica
S80	Hongkezenuo	GZ	Guizhou	Sandu,Guizhou	japonica
S81	Aijiaonuo	GZ	Guizhou	Sandu,Guizhou	japonica
S83	Hanxianggu	GZ	Guizhou	Ceheng,Guizhou	japonica
S86	Huangkezhan	GZ	Guizhou	Ceheng,Guizhou	indica
S89	Danuo	GZ	Guizhou	Ceheng,Guizhou	japonica
S90	Hangu	GZ	Guizhou	Ceheng,Guizhou	japonica
S92	Huangkexiangu	GZ	Guizhou	Ceheng,Guizhou	indica
S93	Feienuo	GZ	Guizhou	Ceheng,Guizhou	indica
S94	Feidongxiangu	GZ	Guizhou	Ceheng,Guizhou	indica
S96	Dongmangbaimizhan	GZ	Guizhou	Ceheng,Guizhou	indica
S98	Dongmangganhuangxianzhan	GZ	Guizhou	Ceheng,Guizhou	indica
S99	Ganhuangbaimizhan	GZ	Guizhou	Ceheng,Guizhou	indica
S100	Zhenuo	GZ	Guizhou	Libo,Guizhou	japonica
S101	Huanglanuo	GZ	Guizhou	Libo,Guizhou	japonica
S102	Hongganyegaimi	GZ	Guizhou	Luodian,Guizhou	indica
S103	Dabaizhan	GZ	Guizhou	Luodian,Guizhou	indica
S104	Niuweituo	GZ	Guizhou	Chishui,Guizhou	japonica
S105	Xiaohezao	GZ	Guizhou	Chishui,Guizhou	indica
S106	Ganzigu	GZ	Guizhou	Chishui,Guizhou	japonica
S107	Baiyangnuo	GZ	Guizhou	Wuchuan,Guizhou	japonica
S108	Gaogannuo	GZ	Guizhou	Wuchuan,Guizhou	japonica
S109	Cungunuo	GZ	Guizhou	Wuchuan,Guizhou	indica
S110	Shiyueqing	GZ	Guizhou	Wuchuan,Guizhou	japonica
S111	Zaomagu	GZ	Guizhou	Daozhen,Guizhou	japonica
S112	Putaogu	GZ	Guizhou	Yanhe,Guizhou	indica
S113	Huihuinuo	GZ	Guizhou	Yanhe,Guizhou	indica
S114	Baizhannuo	GZ	Guizhou	Nayong,Guizhou	japonica
S115	Zhannuo	GZ	Guizhou	Nayong,Guizhou	japonica
S116	Gaoshangedanuo	GZ	Guizhou	Nayong,Guizhou	japonica
S117	Aizinuo	GZ	Guizhou	Dafang,Guizhou	japonica
S118	Zhakounuo	GZ	Guizhou	Dafang,Guizhou	japonica
S119	Huangxiangnuo	GZ	Guizhou	Weining,Guizhou	japonica
S120	Jiaergu	GZ	Guizhou	Shuicheng,Guizhou	japonica
S121	Banbiannuo	GZ	Guizhou	Bijie,Guizhou	japonica
S122	Zhangu	GZ	Guizhou	Hezhang,Guizhou	indica
S124	Liangshuigu	KSR	Guizhou	Congjiang,Guizhou	indica
S125	Mazhan	KSR	Guizhou	Congjiang,Guizhou	indica
S126	Daxianghe	KSR	Guizhou	Congjiang,Guizhou	japonica
S127	Hongmaoxianghe	KSR	Guizhou	Congjiang,Guizhou	japonica
S128	Gousuihuang	KSR	Guizhou	Congjiang,Guizhou	japonica
S129	Bayuehe	KSR	Guizhou	Congjiang,Guizhou	japonica
S130	Dangjiuheinuo	KSR	Guizhou	Congjiang,Guizhou	japonica
S131	Gougunxin	KSR	Guizhou	Congjiang,Guizhou	japonica
S132	Gouhei	KSR	Guizhou	Congjiang,Guizhou	japonica
S133	Badanghe	KSR	Guizhou	Congjiang,Guizhou	japonica
S134	Honghe	KSR	Guizhou	Congjiang,Guizhou	japonica
S135	Heimaohe	KSR	Guizhou	Congjiang,Guizhou	japonica
S136	Hongmihe	KSR	Guizhou	Congjiang,Guizhou	japonica
S137	Nainiaoshuang	KSR	Guizhou	Congjiang,Guizhou	japonica
S138	Gouhuanggang	KSR	Guizhou	Congjiang,Guizhou	japonica
S139	Goumei	KSR	Guizhou	Congjiang,Guizhou	japonica
S140	Tonghuahe	KSR	Guizhou	Congjiang,Guizhou	japonica
S141	Zaobenghonghe	KSR	Guizhou	Congjiang,Guizhou	japonica
S142	Rongguanhe	KSR	Guizhou	Congjiang,Guizhou	japonica
S143	Gouliejiu	KSR	Guizhou	Congjiang,Guizhou	japonica
S144	Goudangjie	KSR	Guizhou	Congjiang,Guizhou	japonica
S145	Zhanlihe	KSR	Guizhou	Congjiang,Guizhou	japonica
S146	Mayaohe	KSR	Guizhou	Congjiang,Guizhou	japonica
S147	Baihe	KSR	Guizhou	Congjiang,Guizhou	japonica
S148	Baijiecao	KSR	Guizhou	Rongjiang,Guizhou	japonica
S149	Ronghe	KSR	Guizhou	Rongjiang,Guizhou	japonica
S151	Banbiannuogu	KSR	Guizhou	Tianzhu,Guizhou	indica
S152	Hongjinggu	KSR	Guizhou	Liping,Guizhou	indica
S153	Baixianghe	KSR	Guizhou	Liping,Guizhou	japonica
S155	Niumangnuo	KSR	Guizhou	Liping,Guizhou	japonica
S156	Banpohe	KSR	Guizhou	Liping,Guizhou	japonica
S157	Gantiannuo	KSR	Guizhou	Liping,Guizhou	indica
S159	Tiehe	KSR	Guizhou	Liping,Guizhou	japonica
S160	Qianainuo	KSR	Guizhou	Liping,Guizhou	indica
S162	Makenuo	KSR	Guizhou	Liping,Guizhou	indica
S163	Bianhe	KSR	Guizhou	Liping,Guizhou	japonica
S164	Datonghe	KSR	Guizhou	Congjiang,Guizhou	japonica
S165	Wumihanhe	KSR	Guizhou	Congjiang,Guizhou	japonica
S166	Heipinuo	KSR	Guizhou	Liping,Guizhou	japonica
S167	Hannuo	KSR	Guizhou	Liping,Guizhou	japonica
S168	Xikenuo	KSR	Guizhou	Jinping,Guizhou	indica
S169	Mabaxiang	KSR	Guizhou	Jinping,Guizhou	indica
S170	Baishanuo	KSR	Guizhou	Jinping,Guizhou	japonica
S171	Xiyinjing	KSR	Guizhou	Liping,Guizhou	indica
S173	Huangshanxue	KSR	Guizhou	Liping,Guizhou	japonica
S174	Rongzhuhe	KSR	Guizhou	Liping,Guizhou	japonica
S175	Dongsuihe	KSR	Guizhou	Liping,Guizhou	japonica
S176	Bianlongtunuo	KSR	Guizhou	Liping,Guizhou	japonica
S177	Heimanghe	KSR	Guizhou	Liping,Guizhou	japonica
S178	Zhaoxinghongmangbainuo	KSR	Guizhou	Liping,Guizhou	japonica
S179	Zhaoxingchangmangdanuo	KSR	Guizhou	Liping,Guizhou	japonica
S180	Zhaoxinghongpibainuo	KSR	Guizhou	Liping,Guizhou	japonica
S181	Deshunnuohe	KSR	Guizhou	Liping,Guizhou	japonica
S182	Wumaohe	KSR	Guizhou	Liping,Guizhou	japonica
S183	Rongjiangxianghe	KSR	Guizhou	Rongjiang,Guizhou	japonica
S184	Dagunuo	KSR	Guizhou	Congjiang,Guizhou	japonica
S185	Danuodao	KSR	Guizhou	Congjiang,Guizhou	japonica
S186	Tianhe	KSR	Guizhou	Congjiang,Guizhou	japonica
S187	Huangkenuohe	KSR	Guizhou	Congjiang,Guizhou	japonica
S188	Xianghenuo	KSR	Guizhou	Congjiang,Guizhou	japonica
S189	Nuohe	KSR	Guizhou	Congjiang,Guizhou	japonica
S190	Heixianghe	KSR	Guizhou	Congjiang,Guizhou	japonica
S191	Goudaha	KSR	Guizhou	Congjiang,Guizhou	japonica
S193	Gouliezhu	KSR	Guizhou	Congjiang,Guizhou	japonica
S194	Xiangmi	KSR	Guizhou	Liping,Guizhou	indica
S195	Gonggenghe	KSR	Guizhou	Liping,Guizhou	japonica
S196	Rongtanghe	KSR	Guizhou	Liping,Guizhou	japonica
S197	Rongdonghe	KSR	Guizhou	Liping,Guizhou	japonica
S198	Wuminghe	KSR	Guizhou	Liping,Guizhou	japonica
S199	Tonghe	KSR	Guizhou	Liping,Guizhou	japonica
S200	Gouhagongniu	KSR	Guizhou	Liping,Guizhou	japonica
S201	Outang	KSR	Guizhou	Liping,Guizhou	japonica
S202	Huangmaohe	KSR	Guizhou	Jianhe,Guizhou	japonica
S203	Dahongjiao	KSR	Guizhou	Rongjiang,Guizhou	indica
S204	Xiliyouzhan	KSR	Guizhou	Rongjiang,Guizhou	indica
S205	Sankecun	KSR	Guizhou	Rongjiang,Guizhou	indica
S206	Guangtouhe	KSR	Guizhou	Rongjiang,Guizhou	japonica
S207	Dalongzhan	KSR	Guizhou	Liping,Guizhou	indica
S208	Dahonggu	KSR	Guizhou	Liping,Guizhou	indica
S209	Maozhan	KSR	Guizhou	Liping,Guizhou	indica
S210	Dongnuo	KSR	Guizhou	Liping,Guizhou	japonica
S211	Bayuexianghe	KSR	Guizhou	Liping,Guizhou	japonica
S212	Ainuohe	KSR	Guizhou	Liping,Guizhou	indica
S213	Maweizhandao	KSR	Guizhou	Jianhe,Guizhou	indica
S214	Xugu	KSR	Guizhou	Jianhe,Guizhou	indica
S215	Gaicao	KSR	Guizhou	Liping,Guizhou	indica
S216	Dabaohe	KSR	Guizhou	Congjiang,Guizhou	japonica
S217	Zhanlinuohe	KSR	Guizhou	Congjiang,Guizhou	japonica
S218	Bianman	KSR	Guizhou	Congjiang,Guizhou	japonica
S219	Gonggu	KSR	Guizhou	Congjiang,Guizhou	japonica
S220	Babamuhe	KSR	Guizhou	Congjiang,Guizhou	japonica
S221	Danianhe	KSR	Guizhou	Congjiang,Guizhou	japonica
S222	Gouhadang	KSR	Guizhou	Congjiang,Guizhou	japonica
S223	Gougong	KSR	Guizhou	Congjiang,Guizhou	japonica
S224	Gouliedainian	KSR	Guizhou	Congjiang,Guizhou	japonica
S225	Gougaoqian	KSR	Guizhou	Congjiang,Guizhou	japonica
S226	Goucengaoka	KSR	Guizhou	Congjiang,Guizhou	japonica
S227	Gouliejiu	KSR	Guizhou	Congjiang,Guizhou	japonica
S228	Gounong	KSR	Guizhou	Congjiang,Guizhou	japonica
S229	Goudai	KSR	Guizhou	Congjiang,Guizhou	japonica
S230	Goudainian	KSR	Guizhou	Congjiang,Guizhou	japonica
S231	Huakegoudaian	KSR	Guizhou	Congjiang,Guizhou	japonica
S232	Baikegoudaian	KSR	Guizhou	Congjiang,Guizhou	japonica
S233	Houyanghaogun	KSR	Guizhou	Congjiang,Guizhou	japonica
S234	Kuihuanuo	EC	Jiangsu	Liyang,Jiangsu	japonica
S235	Wuxiunuo	EC	Jiangsu	Binhai,Jiangsu	japonica
S236	Hangzhounuo	EC	Jiangsu	Wujiang,Jiangsu	japonica
S237	Jiangxinuo	EC	Jiangsu	Changshu,Jiangsu	japonica
S238	Baodao	EC	Jiangsu	Wuxi,Jiangsu	japonica
S239	Xiandaonuo	EC	Jiangsu	Wujin,Jiangsu	japonica
S240	Qianjinnuo	EC	Jiangsu	Xinghua,Jiangsu	japonica
S241	Jiangyinzao	EC	Jiangsu	Wuxi,Jiangsu	indica
S242	Aijiaohuang	EC	Jiangsu	Yixing,Jiangsu	indica
S243	Liushizi	EC	Jiangsu	Lishui,Jiangsu	indica
S244	Huaihuanuo	EC	Jiangsu	Gaochun,Jiangsu	japonica
S245	Zhuangyuanhongnuo	EC	Jiangsu	Jintan,Jiangsu	indica
S246	Huangkenuodao	EC	Jiangsu	Hanjiang,Jiangsu	japonica
S247	Hongpugan	EC	Jiangsu	Xinghua,Jiangsu	indica
S248	Goudongnuo	EC	Jiangsu	Taixian,Jiangsu	japonica
S249	Niujiaobiannuo	EC	Jiangsu	Dongtai,Jiangsu	japonica
S250	Wuzhunuo	EC	Zhejiang	Wencheng,Zhejiang	japonica
S251	Huangnuodao	EC	Zhejiang	Qingtian,Zhejiang	japonica
S252	Chimangnuo	EC	Zhejiang	Lishui,Zhejiang	japonica
S253	Caoxiejin	EC	Zhejiang	Tiantai,Zhejiang	japonica
S254	Bendinuodao	EC	Zhejiang	Ninghai,Zhejiang	japonica
S255	Wukedao	EC	Zhejiang	Jiashan,Zhejiang	japonica
S256	Jianghongnuo	EC	Zhejiang	Jianhan,Zhejiang	japonica
S257	Cuganlizhihong	EC	Zhejiang	Jiaxing,Zhejiang	japonica
S258	Tianjiqing	EC	Zhejiang	Tongxiang,Zhejiang	japonica
S259	Baimidong	EC	Zhejiang	Longquan,Zhejiang	indica
S260	Wukedaomi	EC	Zhejiang	Jiangshan,Zhejiang	japonica
S261	Liushiri	EC	Zhejiang	Jinhua,Zhejiang	indica
S262	Aiwudao	EC	Zhejiang	Changxing,Zhejiang	japonica
S263	Shenshuidaogu	EC	Jiangxi	Xiajiang,Jiangxi	japonica
S264	Youxunuo	EC	Jiangxi	Gaoan,Jiangxi	japonica
S265	Maogunuo	EC	Jiangxi	Nanchang,Jiangxi	japonica
S266	Sijishuidongnuo	EC	Jiangxi	Ganxian,Jiangxi	indica
S267	Maweinuo	EC	Jiangxi	Ningdu,Jiangxi	japonica
S268	Changshennuo	EC	Jiangxi	Yugan,Jiangxi	indica
S269	Hongkenuomi	EC	Jiangxi	Fengcheng,Jiangxi	japonica
S270	Dadongnuo	EC	Jiangxi	Xinjian,Jiangxi	indica
S271	Baimizao	EC	Jiangxi	Wan'an,Jiangxi	indica
S272	Xiangshanyounuozi	EC	Jiangxi	Xunwu,Jiangxi	indica
S273	Wangdingnuo	EC	Jiangxi	Jinxi,Jiangxi	japonica
S274	Hannuo	EC	Jiangxi	Boyang,Jiangxi	indica
S275	Yehezi	EC	Jiangxi	Wanzai,Jiangxi	indica
S276	Hongpinuo	EC	Jiangxi	Jinxian,Jiangxi	japonica
S277	Shenshuidao	EC	Jiangxi	Lianhua,Jiangxi	japonica
S278	Lidongnuo	EC	Jiangxi	Jishui,Jiangxi	japonica
S279	Mianhuanuo	EC	Jiangxi	Wuning,Jiangxi	japonica
S280	Dounuo	SC	Guangdong	Ding'an,Guangdong	japonica
S281	Bainuozi	SC	Guangdong	Yangchun,Guangdong	japonica
S282	Niushinuo	SC	Guangdong	Zhongshan,Guangdong	japonica
S283	Ligounuo	SC	Guangdong	Maba,Guangdong	indica
S284	Xiangnuo	SC	Guangdong	Maba,Guangdong	japonica
S285	Chazai	SC	Guangdong	Guangzhou,Guangdong	japonica
S286	Dichizhong	SC	Guangdong	Luobo,Guangdong	indica
S287	Zaozheng	SC	Guangdong	Meixian,Guangdong	indica
S288	Wukenuo	SC	Guangdong	Chaoan,Guangdong	indica
S289	Qiuyangzao	SC	Guangdong	Xingning,Guangdong	indica
S290	Ruyuanbai	SC	Guangdong	Ruyuan,Guangdong	indica
S291	Baitouyouzhan	SC	Guangdong	Shaoguan,Guangdong	indica
S292	Nanxiongxiazhibai	SC	Guangdong	Nanxiong,Guangdong	indica
S293	Saobajue	SC	Guangdong	Maoming,Guangdong	indica
S294	Jianbizi	SC	Guangdong	Yangchun,Guangdong	indica
S295	Zaoshuiyinzhan	SC	Guangdong	Foshan,Guangdong	indica
S296	Huayaozi	SC	Guangdong	Taishan,Guangdong	indica
S298	Jieyangsanyeqi	SC	Guangdong	Jieyang,Guangdong	indica
S299	Nuogu	SC	Guangxi	Fengshan,Guangxi	japonica
S300	Huangniunuo	SC	Guangxi	Nandan,Guangxi	japonica
S301	Houtunlian	SC	Guangxi	Bama,Guangxi	japonica
S302	Houtai	SC	Guangxi	Donglan,Guangxi	japonica
S303	Tongpinuo	SC	Guangxi	Napo,Guangxi	japonica
S304	Shizinuo	SC	Guangxi	Fengshan,Guangxi	japonica
S305	Danuodao	SC	Guangxi	Jingxi,Guangxi	japonica
S306	Hongrongnuo	SC	Guangxi	Sanjiang,Guangxi	japonica
S307	Bayuegu	SC	Guangxi	Fusui,Guangxi	indica
S308	Dahenuo	SC	Guangxi	Rongxian,Guangxi	indica
S309	Lengshuizhan	SC	Guangxi	Pingnan,Guangxi	indica
S310	Dadongbaike	SC	Guangxi	Luchuan,Guangxi	indica
S311	Yumiaodayezhan	SC	Guangxi	Liucheng,Guangxi	indica
S312	Minmugu	SC	Guangxi	Yangshuo,Guangxi	indica
S313	Heinuogu	SC	Guangxi	Daxing,Guangxi	japonica
S314	Jingxiangnuo	SC	Guangxi	Yicheng,Guangxi	japonica
S315	Housuanwai	SC	Guangxi	Lingyun,Guangxi	japonica
S316	Wuyanuo	SC	Guangxi	Longsheng,Guangxi	japonica
S317	Wubanuo	CC	Hubei	Xianning,Hubei	japonica
S318	Daluochui	CC	Hubei	Jiayu,Hubei	japonica
S319	Yueyangnuo	CC	Hubei	Chongyang,Hubei	japonica
S320	Hongsenuo	CC	Hubei	Yangxin,Hubei	japonica
S321	Dongnuodao	CC	Hubei	Daye,Hubei	japonica
S322	Bajingbaishanuo	CC	Hubei	Enshi,Hubei	indica
S323	Donglianbainuo	CC	Hubei	Dawu,Hubei	indica
S324	Zhongxiangbendinuo	CC	Hubei	Zhongxiang,Hubei	indica
S325	Jinguazi	CC	Hubei	Zhushan,Hubei	japonica
S326	Sankecunnuogu	CC	Hubei	Yidou,Hubei	indica
S327	Beizinuo	CC	Hubei	Zhijiang,Hubei	indica
S328	Badongbairizao	CC	Hubei	Dadong,Hubei	indica
S329	Xuandongjinbaoyin	CC	Hubei	Yien,Hubei	indica
S330	Jinzihuang	CC	Hubei	Baokang,Hubei	japonica
S331	Xiangkenuo	CC	Hunan	Yuanling,Hunan	japonica
S332	Yuankenuo	CC	Hunan	Chenxi,Hunan	japonica
S333	Zinuo	CC	Hunan	Xinhua,Hunan	japonica
S334	Yinshannuo	CC	Hunan	Chengbu,Hunan	japonica
S335	Gouweinuo	CC	Hunan	Changsha,Hunan	japonica
S336	Baijizhan	CC	Hunan	Yiyang,Hunan	indica
S337	Baimagu	CC	Hunan	Chengbu,Hunan	indica
S338	Pingbaigu	CC	Hunan	Chenxi,Hunan	indica
S339	Babaili	CC	Hunan	lingxian,Hunan	indica
S340	Bangqiunuo	EC	Anhui	Tongling,Anhui	indica
S341	Qitoubai	EC	Anhui	Maanshan,Anhui	indica
S342	Banmaozhan	EC	Anhui	Taihu,Anhui	indica
S343	Hongqizao	EC	Anhui	Tongcheng,Anhui	indica
S344	Tuanguzi	EC	Anhui	Lujiang,Anhui	indica
S345	Xiaohongzui	EC	Anhui	Hexian,Anhui	indica
S346	Kajinuo	EC	Anhui	Fengyang,Anhui	japonica
S347	Xiaodongdao	EC	Anhui	Chaohu,Anhui	indica
S348	Langxihongjing	EC	Anhui	Langxi,Anhui	japonica
S349	Zhongyangbai	EC	Anhui	Xiuning,Anhui	indica
S350	Yelisuo	EC	Anhui	Yixian,Anhui	indica
S351	Linxibai	EC	Anhui	Jixi,Anhui	indica
S352	Lengshuinuo	EC	Anhui	Yuexi,Anhui	indica
S353	Jizigu	SW	Yunnan	Jiangcheng,Yunnan	japonica
S354	Changmaogu	SW	Yunnan	Lancang,Yunnan	japonica
S355	Aoyongbang	SW	Yunnan	Ximeng,Yunnan	indica
S356	Huanuo	SW	Yunnan	Lincang,Yunnan	japonica
S357	Dalizaoxian	SW	Yunnan	Dali,Yunnan	indica
S358	Honggu	SW	Yunnan	Yunlong,Yunnan	indica
S359	Hongsagu	SW	Yunnan	Daguan,Yunnan	indica
S360	Daxiangnuo	SW	Yunnan	Puer,Yunnan	japonica
S361	Dabaixiangu	SW	Yunnan	Mojiang,Yunnan	indica
S362	Daxiangnuodao	SW	Yunnan	Mojiang,Yunnan	japonica
S363	Niushigu	SW	Yunnan	Fengqing,Yunnan	indica
S364	Huangsigu	SW	Yunnan	Funing,Yunnan	indica
S365	Hongguxian	SW	Yunnan	Luoping,Yunnan	indica
S366	Wuyuehuang	SW	Yunnan	Yongren,Yunnan	indica
S367	Heigu	SW	Yunnan	Diqing,Yunnan	indica
S368	Luoluogu	SW	Yunnan	Weixi,Yunnan	indica
S369	Bayuehuang	SW	Sichuan	Baxian,Sichuan	indica
S370	Lancaohua	SW	Sichuan	Wanxian,Sichuan	indica
S371	Xiaomaguzi	SW	Sichuan	Gulin,Sichuan	indica
S372	Xiaohezaodao	SW	Sichuan	Hejiang,Sichuan	indica
S373	Aizhuangzi	SW	Sichuan	Fushun,Sichuan	indica
S374	Airengu	SW	Sichuan	Luxian,Sichuan	indica
S375	Bailuochuan	SW	Sichuan	Bishan,Sichuan	indica
S376	Maweisi	SW	Sichuan	Zizhong,Sichuan	indica
S377	Luohangu	SW	Sichuan	Shehong,Sichuan	indica
S378	Dayunnanzhan	SW	Sichuan	Anyue,Sichuan	indica
S379	Ermagu	SW	Sichuan	Pengshan,Sichuan	indica
S380	Bashizao	SW	Sichuan	Hanyuan,Sichuan	indica
S381	Zhuyanuo	SW	Sichuan	Pengshui,Sichuan	indica
S382	Yinyuzi	SW	Sichuan	Xichang,Sichuan	indica
S383	Qinggangu	SW	Sichuan	Kuaidong,Sichuan	indica
S384	Wanlugou	EC	Fujian	Anxi,Fujian	japonica
S385	Zhunuozao	EC	Fujian	Xianyou,Fujian	indica
S386	Feitui	EC	Fujian	Changle,Fujian	indica
S387	Hongmihualuo	EC	Fujian	Yongchun,Fujian	indica
S388	Gaoganyudanbai	EC	Fujian	Gutian,Fujian	japonica
S389	Dawuchi	EC	Fujian	Nanjing,Fujian	indica
S390	Huangjinuo	EC	Fujian	Xiapu,Fujian	japonica
S391	Huoshao	EC	Fujian	Changting,Fujian	japonica
S392	Sanyeqi	EC	Fujian	Qingliu,Fujian	indica
S393	Shoutianjian	EC	Fujian	Jianning,Fujian	indica
S394	Xiafudao	EC	Fujian	Jiangle,Fujian	indica
S395	Nongguang	EC	Fujian	Jianyang,Fujian	indica
S396	Leigongman	EC	Fujian	Huaan,Fujian	indica
S397	Yangkoubai	EC	Fujian	Shaowu,Fujian	japonica
S398	Baishizai	EC	Fujian	Nanping,Fujian	indica

## Sheet: Table S2
Table S2 qRT-PCR primers
Gene name	Primer name	Primer sequence (5' to 3')
UBI	UBI-3F	CGCCGACTACAACATCCAGA
	UBI-3R	GCGTCGTCCACCTTGTAGAA
Os08g13020	Os08g13020-3F	AGGATGAAGTTGCTGTGCGA
	Os08g13020-3R	TGTATTGCCTTGCCCCTGTT
Os08g13030	Os08g13030-4F	TCTTGATGTGCAGACCGTCG
	Os08g13030-4R	TGCCACCACATCATCCATCT

## Sheet: Table S3
Table S3. List of GWAS peaks.
Trait	QTL	Chrom	Physical Interval（bp）	SNP number	Top SNP	P value	PVE(%)	Overlapped with different traits	Overlapped with previously reported QTLs	Known salt tolerance gene	Candidate gene
T2W	qT2W1	1	15133658-15333658	1	15033658	4.3968e-06	6.988			OsHAK3、OsCUL1-3	LOC_Os01g27190、LOC_Os01g27170
T2W	qT2W2	2	19060584-19260584	1	19160584	6.9016e-06	6.62			OsClpD1	LOC_Os02g32590、LOC_Os02g32430
T2W	qT2W3	3	12433461-12633461	3	12533461	3.7956e-06	6.927				LOC_Os03g21800、LOC_Os03g22050、LOC_Os03g21790、LOC_Os03g21870、LOC_Os03g21890、LOC_Os03g21990
T2W	qT2W4	4	27148215-27348215	1	27248215	4.7032e-06	6.955				LOC_Os04g46020、LOC_Os04g45990、LOC_Os04g46010、LOC_Os04g45930、LOC_Os04g46060
T2W	qT2W6.1	6	2552436-2752436	2	2652436	7.6089e-06	6.528				LOC_Os06g05890、LOC_Os06g05970、LOC_Os06g05800、LOC_Os06g05990
T2W	qT2W6.2	6	17948677-18148677	1	18048677	7.0098e-06	7.022		qDSW6.1,QSnc6		LOC_Os06g31300、LOC_Os06g30860
T2W	qT2W7	7	15045973-15245973	1	15145973	1.7016e-06	7.403				LOC_Os07g26460
T2W	qT2W8.1	8	6205383-6547146	43	6447146	6.4912e-07	7.947			OsHAK12	LOC_Os08g10649、LOC_Os08g10560、LOC_Os08g10630、LOC_Os08g10550、LOC_Os08g10600、LOC_Os08g10608
T2W	qT2W8.2	8	6551546-7546815	367	7312883	1.5368e-08	10.144				LOC_Os08g12680
T2W	qT2W8.3	8	7549213-7749213	21	7707975	2.5154e-06	7.175	T4W		OsDPK1	LOC_Os08g12780、LOC_Os08g12800、LOC_Os08g12850、LOC_Os08g12890、LOC_Os08g13000、LOC_Os08g13020、LOC_Os08g13030
T2W	qT2W8.4	8	7806989-8006989	1	7906989	6.946e-06	7.01	T4W			LOC_Os08g13180、LOC_Os08g13440
T2W	qT2W9.1	9	5191845-5391845	1	5291845	3.5625e-06	7.462				LOC_Os09g09830、LOC_Os09g09850、LOC_Os09g09930
T2W	qT2W9.2	9	10553963-10753963	1	10653963	7.2748e-06	6.649				LOC_Os09g17530、LOC_Os09g17540
T2W	qT2W10.1	10	4296696-4496696	3	4396696	1.1313e-06	8.525				LOC_Os10g08280
T2W	qT2W10.2	10	8646252-8846252	2	8746252	1.1954e-06	8.136				LOC_Os10g17260、LOC_Os10g17280、LOC_Os10g17454、LOC_Os10g17489
T2W	qT2W10.3	10	19081930-19281930	5	19181930	1.0089e-06	8.029				LOC_Os10g35680、LOC_Os10g35850、LOC_Os10g35870、LOC_Os10g35920
T4W	qT4W1.1	1	757649-957649	1	857649	9.0484e-06	6.14				LOC_Os01g02390、LOC_Os01g02400、LOC_Os01g02410、LOC_Os01g02420
T4W	qT4W1.2	1	21388356-21588356	1	21488356	1.1646e-06	7.469				LOC_Os01g38359、LOC_Os01g38180、LOC_Os01g38229
T4W	qT4W3.1	3	2104526-2304526	1	2204526	9.709e-07	7.128		qST3	OsBMY4; OsBAM3、MHZ6; OsEIL1	LOC_Os03g04530、LOC_Os03g04620、LOC_Os03g04630、LOC_Os03g04640、LOC_Os03g04650、LOC_Os03g04660、LOC_Os03g04680、LOC_Os03g04750、LOC_Os03g04780
T4W	qT4W3.2	3	8167241-8367241	1	8267241	8.7352e-06	6.186				LOC_Os03g15000、LOC_Os03g15020、LOC_Os03g15210、LOC_Os03g15220、LOC_Os03g15230、LOC_Os03g15250、LOC_Os03g15270
T4W	qT4W3.3	3	11601672-11801672	5	11701672	3.6998e-06	6.415			OsLEA3-2	LOC_Os03g20530、LOC_Os03g20550、LOC_Os03g20650、LOC_Os03g20680、LOC_Os03g20720、LOC_Os03g20760
T4W	qT4W6	6	14800199-15000199	1	14900199	2.5005e-06	7.245		qDSW6.1,QSnc6		LOC_Os06g25294
T4W	qT4W7	7	24190911-24390911	1	24290911	6.2239e-06	6.66				LOC_Os07g40570、LOC_Os07g40480、LOC_Os07g40300
T4W	qT4W8.1	8	7536609-7782973	21	7682973	2.3277e-07	8.572	T2W			LOC_Os08g12780、LOC_Os08g12800、LOC_Os08g12850、LOC_Os08g12890、LOC_Os08g13000、LOC_Os08g13020、LOC_Os08g13030
T4W	qT4W8.2	8	7876281-8076281	1	7976281	3.0232e-06	7.152	T2W			LOC_Os08g13440
T4W	qT4W9.1	9	203925-403925	1	303925	2.7414e-06	6.58				LOC_Os09g01290
T4W	qT4W9.2	9	570534-870534	3	670534	3.6012e-06	6.457			OsNHAD	LOC_Os09g01960
T4W	qT4W9.3	9	9712726-9912726	1	9812726	8.5654e-06	7.048				LOC_Os09g16030、LOC_Os09g16090
T4W	qT4W10.1	10	6326736-6526736	7	6426736	5.9858e-06	6.417				LOC_Os10g11580、LOC_Os10g11370、LOC_Os10g11730、LOC_Os10g11750、LOC_Os10g11354
T4W	qT4W10.2	10	8000286-8200286	2	8100286	5.7399e-06	6.272				LOC_Os10g15390
T4W	qT4W10.3	10	9255316-9455316	1	9355316	6.8387e-06	7.784				LOC_Os10g18400、LOC_Os10g18490、LOC_Os10g18530、LOC_Os10g18364
T4W	qT4W10.4	10	12390803-12590803	1	12490803	8.508e-06	5.991				LOC_Os10g24050
T4W	qT4W11.1	11	21641757-21841757	17	21741757	3.7151e-06	6.904		qSKC11		LOC_Os11g36740、LOC_Os11g36790、LOC_Os11g36930、LOC_Os11g36960、LOC_Os11g36970、LOC_Os11g37000
T4W	qT4W11.2	11	22388780-22588780	1	22488780	2.6214e-06	6.741				LOC_Os11g37920、LOC_Os11g38020、LOC_Os11g38050
T4W	qT4W11.3	11	23350470-23550470	1	23450470	2.8359e-06	6.959				LOC_Os11g39420、LOC_Os11g39480、LOC_Os11g39490
T4W	qT4W12.1	12	9714268-9914268	9	9814268	1.7741e-07	7.126				LOC_Os12g17310
T4W	qT4W12.2	12	15433626-15633626	11	15533626	2.0567e-07	6.956				LOC_Os12g27060
T4W	qT4W12.3	12	19258667-19458667	1	19358667	2.3857e-06	7.223				LOC_Os12g32250
T4W	qT4W12.4	12	22754089-22954089	5	22854089	6.9029e-08	10.988				LOC_Os12g37370

## Sheet: Table S4
Table S4 Candidate gene/QTL panel for allele pyramiding analysis
Trait	Chr	Top SNP	P value	Candidate gene / QTL	Allele
T2W	1	15033658	4.3968e-06	OsHAK3	T/C
	2	19160584	6.9016e-06	OsClpD1	G/A
	3	12533461	3.7956e-06	qT2W3	C/T
	8	7707975	2.5154e-06	OsDPK1	T/A
T4W	3	11701672	3.6998e-06	OsLEA3-2	T/A
	9	303925	2.7414e-06	qT4W9.1	A/G
	10	6426736	5.9858e-06	qT4W10.1	G/A
	11	22488780	2.6214e-06	qT4W11.2	C/T

## Sheet: Table S5
Table S5 salt tolerance accessions carries superior alleles of different cold tolerance genes
ID	Group	Name	OsST8.1	OsST8.2	OsHAK3	OsDPK1	OsLEA3-2	OsNHAD
s243	EC	Liushizi	√	√	√	√	√	√
s268	EC	Changshennuo	√	√	√	√	√	√
s274	EC	Hannuo	√	√	√	√	√	√
s342	EC	Banmaozhan	√	√	√	√	√	√
s344	EC	Tuanguzi	√	√	√	√	√	√
s349	EC	Zhongyangbai	√	√	√	√	√	√
s351	EC	Linxibai	√	√	√	√	√	√
s352	EC	Lengshuinuo	√	√	√	√	√	√
s385	EC	Zhunuozao	√	√	√	√	√	√
s387	EC	Hongmihualuo	√	√	√	√	√	√
s392	EC	Sanyeqi	√	√	√	√	√	√
s393	EC	Shoutianjian	√	√	√	√	√	√
s398	EC	Baishizai	√	√	√	√	√	√
