# Supplementary material for: Genome-wide association study identifies candidate genes for salt tolerance in traditional rice landraces
Source: Research Square preprint supplement (doi:10.21203/rs.3.rs-7832023/v1), 2025-11-03
Supplement: Supplementary file 2 [file 6cacc24942aba17d673d63a3.docx]

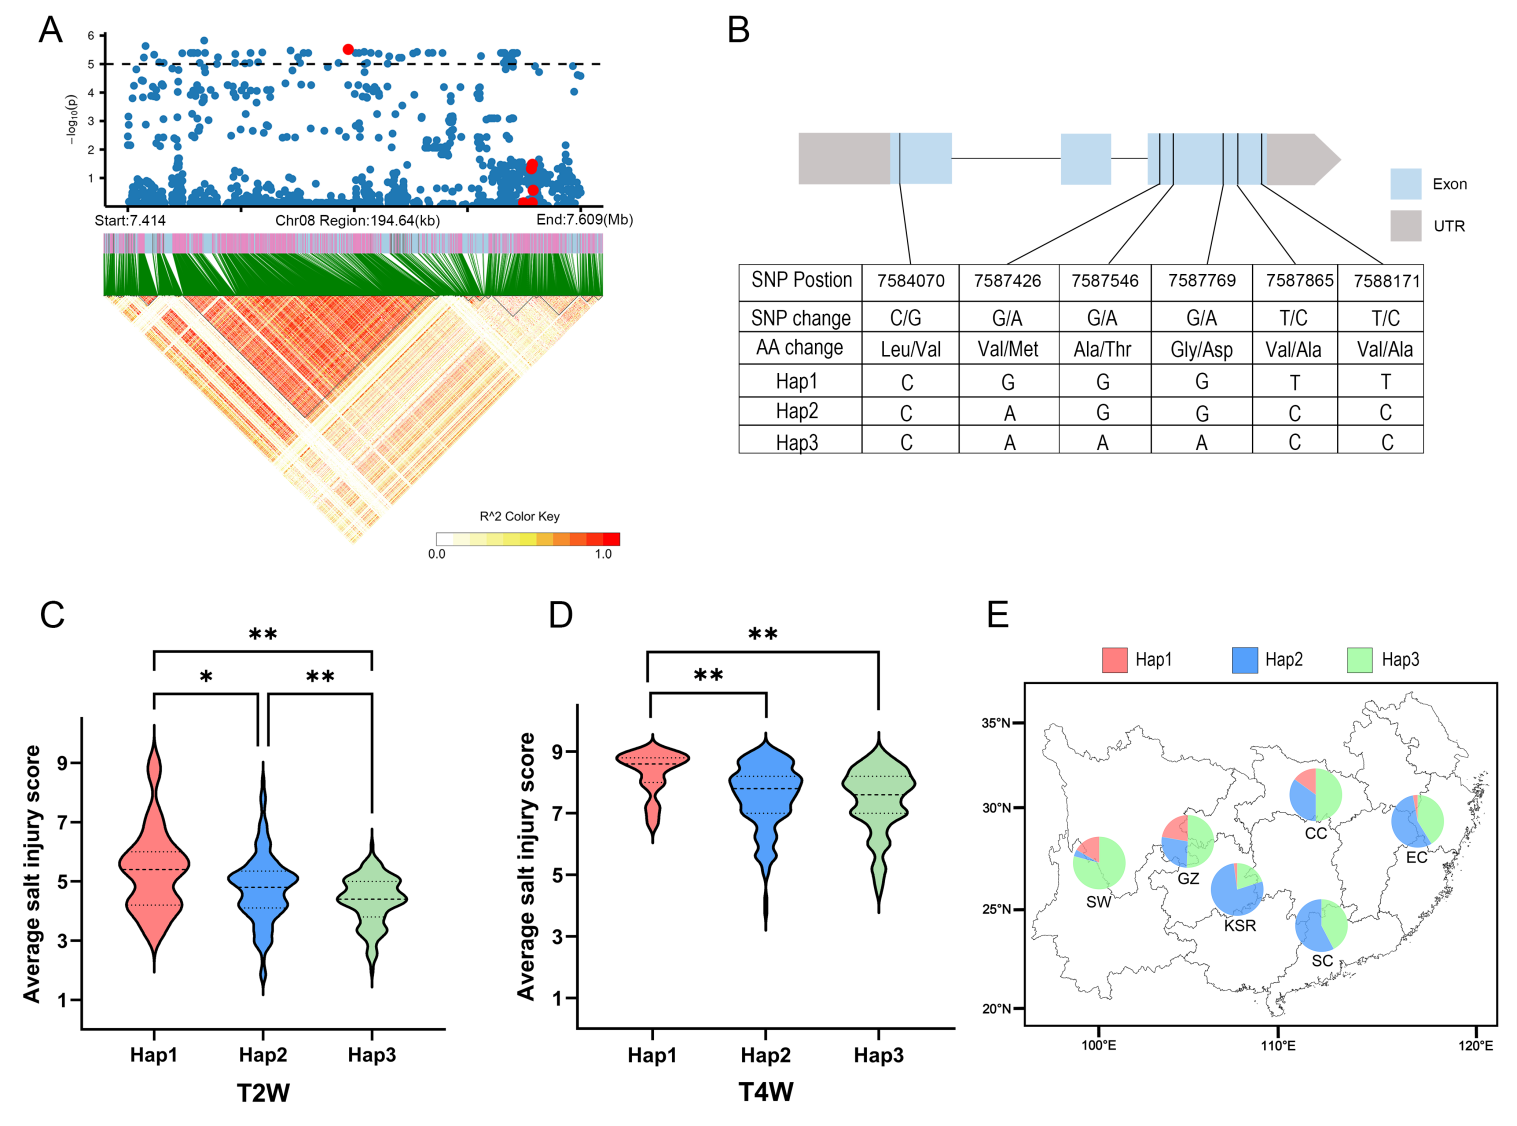


**Figure S1. Haplotype analysis of *OsSST1* associated with salt tolerance.** (A) Partial Manhattan plot (top) and LD heatmap (bottom) surrounding the peak region on chromosome 8. The red dot indicates the position of a missense variant in *OsSST1*. (B) Gene structure and polymorphism sites in *OsSST1*. (C–D) Violin plots showing ASIS values at T2W and T4W for different *OsSST1* haplotypes (**p* < 0.05, ***p* < 0.01). (E) Frequency distribution of haplotypes across different subpopulations.

*
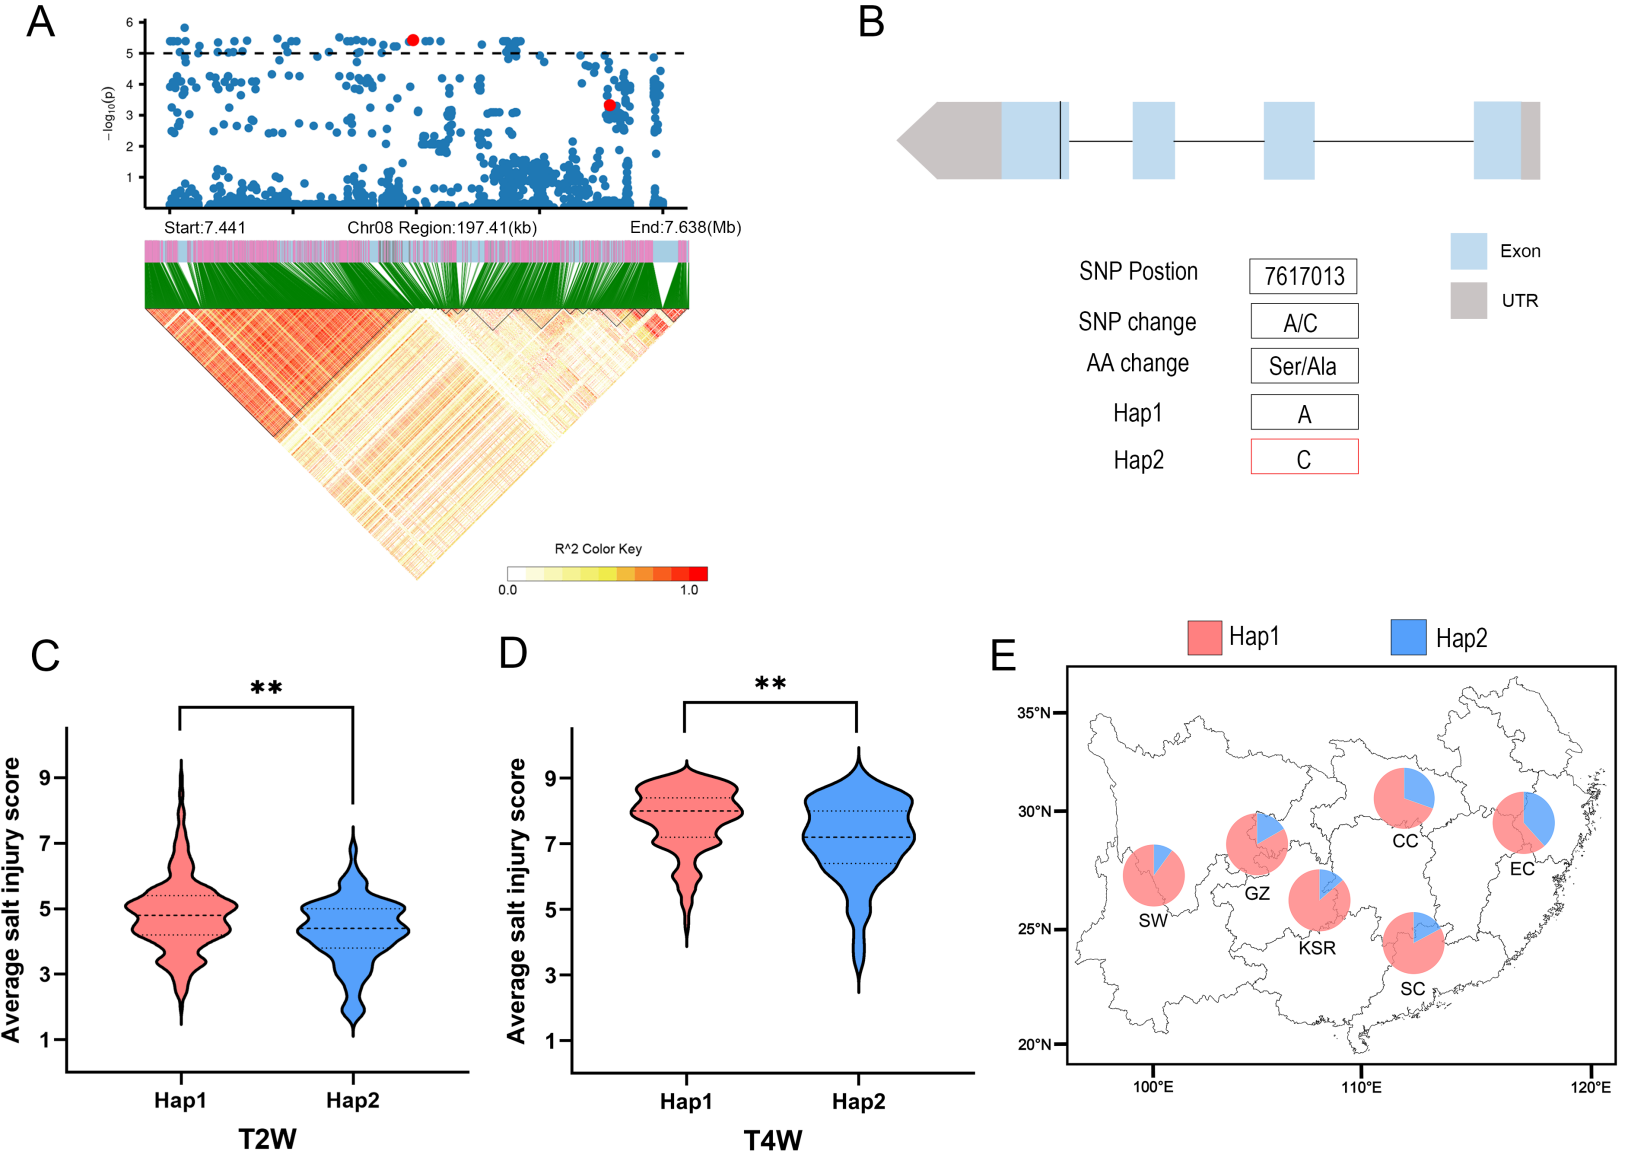
*

**Figure S2. Haplotype analysis of *OsPPR1* associated with salt tolerance.** (A) Partial Manhattan plot (top) and LD heatmap (bottom) surrounding the peak region on chromosome 8. The red dot indicates the position of a missense variant in *OsPPR1*. (B) Gene structure and polymorphism sites in *OsPPR1*. (C–D) Violin plots showing ASIS values at T2W and T4W for different *OsPPR1* haplotypes (**p* < 0.05, ***p* < 0.01). (E) Frequency distribution of haplotypes across different subpopulations.
